# Supplementary material for: Effect of Postoperative Oral Intake on Prognosis for Esophageal Cancer
Source: PubMed Central journal article supplement (PMC6627190; doi:10.3390/nu11061338), 2019-06-14
Supplement: nutrients-11-01338-s001.pdf [file nutrients-11-01338-s001.pdf]

*Supplement data*

**Table S1: Equations of BEE, PNI, and NRI**

- 
1. Harris–Benedict equation [Basal energy expenditure (BEE)]

Men:  $BEE = 66.47 \times 13.75 \times Weight (kg) + Height (cm) - 6.76 \times Age (years)$

Women:  $BEE = 655.1 + 9.65 \times Weight (kg) + 1.85 \times Height (cm) - 4.68 \times Age (years)$

---

2. Prognostic nutritional index (PNI)

$$PNI = 10 \times Albumin (g/dL) + 0.005 \times TLC (cells/mm^3)$$

---

3. Nutritional risk index (NRI)

$$NRI = 10.7 \times Albumin (g/dL) + 0.00039 \times TLC (cells/mm^3) + 0.11 \times Zinc (\mu g/dL) - 0.44 \times Age (years)$$

---

**Table S2: Equations of CONUT**

$$\text{CONUT score} = \text{Albumin score} + \text{TLC score} + \text{T-Cho score}$$

| Parameter                    | Under nutrition degree |             |           |        |
|------------------------------|------------------------|-------------|-----------|--------|
|                              | Normal                 | Light       | Moderate  | Severe |
| CONUT score                  | 0–1                    | 2–4         | 5–8       | 9–12   |
| Albumin (g/dL)               | 3.5–4.5                | 3.0–3.49    | 2.5–2.9   | < 2.5  |
| Albumin score                | 0                      | 2           | 4         | 6      |
| TLC (cells/mm <sup>3</sup> ) | > 1,600                | 1,200–1,599 | 800–1,199 | < 800  |
| TLC score                    | 0                      | 1           | 2         | 3      |
| T-Cho (mg/dL)                | >180                   | 140–180     | 100–139   | < 100  |
| T-Cho score                  | 0                      | 1           | 2         | 3      |
